# Supplementary material for: miR-210 and miR-152 as Biomarkers by Liquid Biopsy in Invasive Ductal Carcinoma
Source: PubMed Central journal article supplement (PMC7825421; doi:10.3390/jpm11010031), 2021-01-06

## MiR-210 and miR-152 as Biomarkers by Liquid Biopsy in Invasive Ductal Carcinoma

Beatriz Camargo Lopes<sup>1,2</sup>, Fabrício Valiante Ventura<sup>2</sup>, Jéssica Gisleine de Oliveira<sup>2,3</sup>, Cristine Zampieri Braga<sup>2</sup>, Edson Mitsuro Kato-Junior<sup>2</sup>, Newton Antonio Bordin-Junior<sup>3</sup>, Debora Aparecida Pires de Campos Zuccari<sup>1,2,3\*</sup>

### SUPPLEMENTARY MATERIALS

**Table S1.** Description of microRNAs.

| <b>miR-210-3p</b>            |                                                                                                                           |
|------------------------------|---------------------------------------------------------------------------------------------------------------------------|
| <i>Chromosome Location</i>   | Chr.11 - 568112-568171 [-]<br>on UCSC Ensembl                                                                             |
| <i>Mature miRNA Sequence</i> | CUGUGCGUGUGACAGCGGCUGA                                                                                                    |
| <i>Stem Loop</i>             | ACCCGGCAGUGCCUCCAGGCGCAGGGCAGCCCC<br>UGCCACCGCACACUGCGCUGCCCCAGACCCACU<br>GUGCGUGUGACAGCGGCUGAUCUGUGCCUGGGC<br>AGCGCGACCC |

| <b>miR-152-3p</b>            |                                                                                                   |
|------------------------------|---------------------------------------------------------------------------------------------------|
| <i>Chromosome Location</i>   | Chr. 17 - 48037161 - 48037247 [-]<br>on Build GRCh38                                              |
| <i>Mature miRNA Sequence</i> | UCAGUGCAUGACAGAACUUGG                                                                             |
| <i>Stem Loop</i>             | UGUCCCCCCCCGGCCCAGGUUCUGUGAUACACUC<br>CGACUCGGGCUCUGGAGCAGUCAGUGCAUGACA<br>GAACUUGGGCCCCGGAAGGACC |

Source: miRBase (<http://www.mirbase.org>)

**Table S2.** Primary antibodies used in immunohistochemical techniques and their respective specifications.

| <b>Antibody</b>                 | <b>Company</b>                            | <b>Clone</b> | <b>Dilution IHC</b> | <b>Marking</b> | <b>Positive Control</b> |
|---------------------------------|-------------------------------------------|--------------|---------------------|----------------|-------------------------|
| <b>HIF-1<math>\alpha</math></b> | Santa Cruz Biotechnology, Dallas, TX, USA | H1alpha67    | 1:25                | Cytoplasmatic  | Human breast Carcinoma  |

|               |                                                  |            |       |               |        |
|---------------|--------------------------------------------------|------------|-------|---------------|--------|
| <b>VHL</b>    | <i>ABCAM, Cambridge, UK</i>                      | 1E1        | 1:200 | Cytoplasmatic | Kidney |
| <b>IGF-1R</b> | <i>Sigma-Aldrich, St. Louis, MO, USA</i>         | C-terminal | 1:50  | Cytoplasmatic | Liver  |
| <b>VEGF</b>   | <i>Santa Cruz Biotechnology, Dallas, TX, USA</i> | A-20       | 1:300 | Cytoplasmatic | Liver  |

**Figure S1.** Photomicrographs of the positive and negative controls of the target proteins during the immunohistochemistry reaction. Magnification of 40×. Bar: 20 μm.

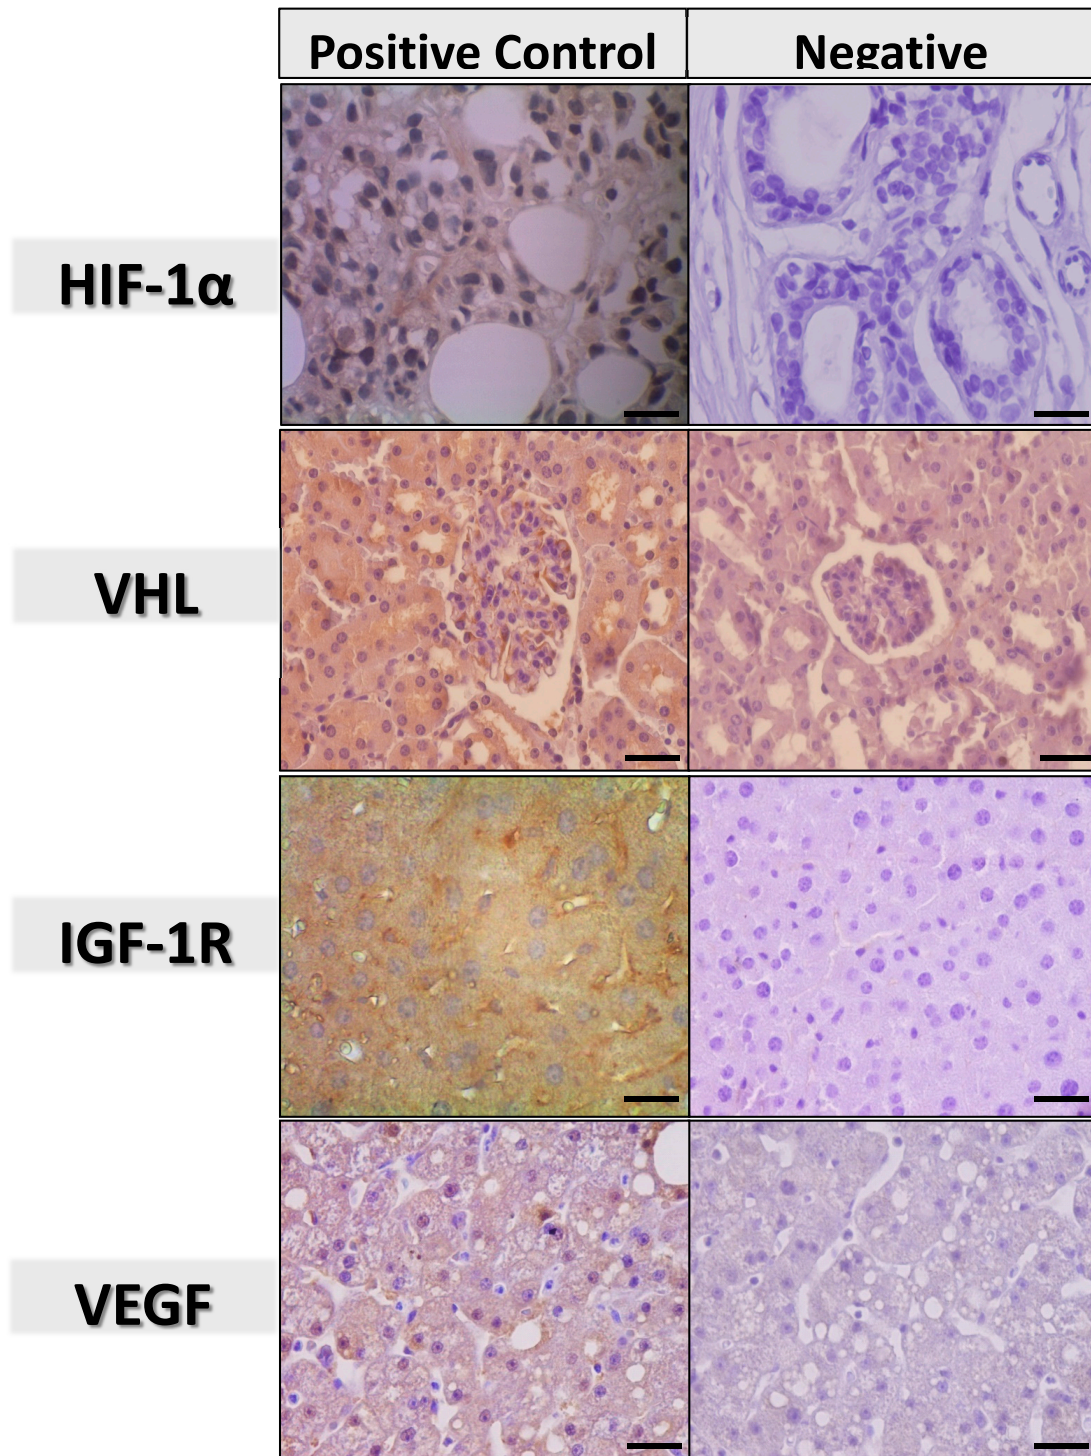

Supplement: jpm-11-00031-s001.pdf [file jpm-11-00031-s001.pdf]
